# Supplementary material for: Antiplatelet therapy in the primary prevention of cardiovascular disease in patients with chronic obstructive pulmonary disease: a randomised controlled proof-of-concept trial
Source: PubMed Central journal article supplement — ERJ Open Res. 2019 Aug 5;5(3):00110-2019. doi: 10.1183/23120541.00110-2019 (PMC6680071; doi:10.1183/23120541.00110-2019), 2019-08-05
Supplement: 00110-2019.supp.pdf [file 00110-2019.supp.pdf]

APPLE COPD Trial Supplementary materials

Supplementary Table S1: Dosing schedule of those starting treatment

|                                                                                        | Dosing received | Placebo                                 | Aspirin                                  | Ticagrelor                               | DAPT                                   | Total                             |
|----------------------------------------------------------------------------------------|-----------------|-----------------------------------------|------------------------------------------|------------------------------------------|----------------------------------------|-----------------------------------|
| <b>Number completed treatment intervals†</b>                                           | <b>1-2</b>      | 26 (83.9%)                              | 26 (83.9%)                               | 19 (65.5%)                               | 12 (41.4%)                             | 83 (69.2%)                        |
|                                                                                        | <b>1-#</b>      | 3 (9.7%)                                | 4 (12.9%)                                | 6 (20.7%)                                | 2 (6.9%)                               | 15 (12.5%)                        |
|                                                                                        | <b>#-#</b>      | 2 (6.5%)                                | 1 (3.2%)                                 | 4 (13.8%)                                | 15 (51.7%)                             | 22 (18.3%)                        |
| <b>Total starting treatment n(%)</b>                                                   |                 | 31 (100%)                               | 31 (100%)                                | 29 (100%)                                | 29 (100%)                              | 120 (100%)                        |
| <b>Time of treatment from randomisation (days):</b><br>Min<br>Median (IQR)<br>Max<br>N |                 | 0<br>0.0 (0.0, 0.0)<br>1‡<br>31         | 0<br>0.0 (0.0, 0.0)<br>6‡<br>31          | 0<br>0.0 (0.0, 0.0)<br>0<br>29           | 0<br>0.0 (0.0, 0.0)<br>0<br>29         | 0<br>0.0 (0.0,0.0)<br>6<br>120    |
| <b>Time on treatment from randomisation (days):</b><br>Min<br>Median (IQR)<br>Max<br>n |                 | 89<br>183.0 (181.0, 189.0)<br>269<br>31 | 114<br>186.0 (182.0, 191.0)<br>281<br>31 | 22<br>182.0 (143.5, 185.0)<br>250<br>28* | 2<br>162.0 (37.5, 184.0)<br>222<br>28* | 2<br>182 (175,189)<br>281<br>118* |

1= BL to 3 months, 2=3 months- 6 months # did not complete interval.

\*There are two patients that did not return after their baseline visit and being dispensed the first set of drugs so there time on treatment is unknown and set to missing.

† Defined as being on treatment until the end of that interval based on a non-missing visit date.

‡ Only 2 participants did not start treatment on the day of randomisation.

**Supplementary Table S2 (a): Dosage summary for aspirin or aspirin placebo**

|                                                   | Placebo n=31 |           |           | Aspirin n=31 |           |           | Ticagrelor n=29 |          |          | DAPT n=29 |           |          | Total (n=120) |           |           |
|---------------------------------------------------|--------------|-----------|-----------|--------------|-----------|-----------|-----------------|----------|----------|-----------|-----------|----------|---------------|-----------|-----------|
|                                                   | BL-3M        | 3M-6M     | Total     | BL-3M        | 3M-6M     | Total     | BL-3M           | 3M-6M    | Total    | BL-3M     | 3M-6M     | Total    | BL-3M         | 3M-6M     | Total     |
| <b>Number of patients observed at later visit</b> | 29           | 28        |           | 30           | 28        |           | 25              | 23       |          | 17        | 23        |          | 101           | 102       |           |
| <b>Number with % protocol dose ≥80%, n (%)</b>    | 21 (84%)     | 23 (88.5) | 21 (87.5) | 22 (88)      | 24 (92.3) | 21 (91.3) | 21 (87.5)       | 17 (100) | 17 (100) | 10 (76.9) | 11 (84.6) | 9 (81.8) | 74 (85.1)     | 75 (91.5) | 68 (90.7) |

**Supplementary Table S2 (b): Dosage summary for Ticagrelor or placebo Ticagrelor**

|                                                   | Placebo n=31 |           |           | Aspirin n=31 |           |         | Ticagrelor n=29 |          |          | DAPT n=29 |           |          | Total (n=120) |         |         |
|---------------------------------------------------|--------------|-----------|-----------|--------------|-----------|---------|-----------------|----------|----------|-----------|-----------|----------|---------------|---------|---------|
|                                                   | BL-3M        | 3M-6M     | Total     | BL-3M        | 3M-6M     | Total   | BL-3M           | 3M-6M    | Total    | BL-3M     | 3M-6M     | Total    | BL-3M         | 3M-6M   | Total   |
| <b>Number of patients observed at later visit</b> | 29           | 28        |           | 30           | 28        |         | 25              | 23       |          | 17        | 23        |          | 101           | 102     |         |
| <b>Number with % protocol dose ≥80%, n(%)</b>     | 21 (84)      | 22 (84.6) | 21 (87.5) | 22 (88)      | 24 (92.3) | 20 (87) | 20 (87)         | 17 (100) | 17 (100) | 10 (76.9) | 10 (76.9) | 8 (72.7) | 73 (84.9)     | 73 (89) | 66 (88) |



**Supplementary Table S4: Summary statistics for breathlessness measures (repeated by treatment group).**

|                                    | Total              |                    | Placebo           |                   | Aspirin           |                   | Ticagrelor        |                   | DAPT              |                   |
|------------------------------------|--------------------|--------------------|-------------------|-------------------|-------------------|-------------------|-------------------|-------------------|-------------------|-------------------|
| Variable                           | Baseline           | 6M                 | Baseline          | 6M                | Baseline          | 6M                | Baseline          | 6M                | Baseline          | 6M                |
| <b>MRC dyspnoea</b><br>Mean (SD) n | 3.5 (1.1)<br>120   | 3.6 (1.1)<br>102   | 3.6 (1.0)<br>31   | 3.8 (1.0)<br>28   | 3.7 (1.1)<br>31   | 3.7 (1.0)<br>28   | 3.4 (1.3)<br>29   | 3.4 (1.3)<br>23   | 3.3 (1.2)<br>29   | 3.3 (1.2)<br>23   |
| <b>FEV1 (L)</b><br>Mean (SD)<br>n  | 1.22 (0.59)<br>119 | 1.14 (0.56)<br>101 | 1.21 (0.49)<br>30 | 1.16 (0.47)<br>27 | 1.19 (0.72)<br>31 | 1.10 (0.69)<br>28 | 1.22 (0.62)<br>29 | 1.07 (0.58)<br>23 | 1.27 (0.53)<br>29 | 1.22 (0.48)<br>23 |
| <b>FEV1 %</b><br>Mean (SD)<br>n    | 46.5 (17.6)<br>119 | 42.7 (16.8)<br>101 | 45.4 (18.8)<br>30 | 42.9 (18.0)<br>27 | 46.5 (17.8)<br>31 | 41.7 (16.9)<br>28 | 46.1 (18.7)<br>29 | 40.3 (18.4)<br>23 | 47.9 (15.5)<br>29 | 46.3 (14.0)<br>23 |
| <b>FVC</b><br>Mean (SD)<br>n       | 2.51 (0.92)<br>118 | 2.45 (0.92)<br>101 | 2.65 (0.81)<br>30 | 2.61 (0.79)<br>27 | 2.35 (1.04)<br>30 | 2.35 (1.12)<br>28 | 2.51 (0.99)<br>29 | 2.31 (0.83)<br>23 | 2.54 (0.86)<br>29 | 2.51 (0.88)<br>23 |

Supplementary Table S5 (a): Reported AEs on ITT population

| Related to treatment                           | Severity | Placebo<br>n(%) | Aspirin<br>n(%) | Ticagrelor<br>n(%) | DAPT<br>n(%) | Total      |
|------------------------------------------------|----------|-----------------|-----------------|--------------------|--------------|------------|
| Definitely                                     | Mild     | 0               | 0               | 0                  | 2 (6.25)     | 2 (1.82)   |
|                                                | Moderate | 0               | 0               | 0                  | 0            | 0          |
|                                                | Severe   | 0               | 0               | 0                  | 1 (3.13)     | 1 (0.91)   |
| Probable                                       | Mild     | 0               | 0               | 1 (2.86)           | 3 (9.38)     | 4 (3.64)   |
|                                                | Moderate | 0               | 0               | 2 (5.71)           | 5 (15.6)     | 7 (6.36)   |
|                                                | Severe   | 0               | 0               | 0                  | 0            | 0          |
| Possible                                       | Mild     | 1 (4.76)        | 0               | 4 (11.4)           | 2 (6.25)     | 7 (6.4)    |
|                                                | Moderate | 1 (4.76)        | 0               | 3 (8.57)           | 6 (18.75)    | 10 (9.09)  |
|                                                | Severe   | 0               | 0               | 0                  | 0            | 0          |
| Unlikely                                       | Mild     | 0               | 1 (4.55)        | 1 (2.86)           | 0            | 2 (1.82)   |
|                                                | Moderate | 0               | 0               | 0                  | 1 (3.13)     | 1 (0.91)   |
|                                                | Severe   | 0               | 0               | 0                  | 0            | 0          |
| Unrelated                                      | Mild     | 13 (61.9)       | 16 (72.7)       | 20 (57.1)          | 10 (31.25)   | 59 (53.6)  |
|                                                | Moderate | 6 (28.57)       | 5 (22.7)        | 4 (11.4)           | 1 (3.1)      | 16 (14.6)  |
|                                                | Severe   | 0               | 0               | 0                  | 1 (3.1)      | 1 (0.9)    |
| Total Related (Possible, Probable, Definitely) | Mild     | 1 (4.76)        | 0               | 5 (14.3)           | 7 (21.88)    | 13 (11.8)  |
|                                                | Moderate | 1 (4.76)        | 0               | 5 (14.29)          | 11 (34.38)   | 17 (15.45) |
|                                                | Severe   | 0               | 0               | 0                  | 1 (3.13)     | 1 (0.91)   |
| Total unlikely or unrelated                    | Mild     | 13 (61.9)       | 17 (77.27)      | 21 (60)            | 10 (31.25)   | 61 (55.45) |
|                                                | Moderate | 6 (28.57)       | 5 (22.7)        | 4 (11.4)           | 2 (6.25)     | 17 (15.5)  |
|                                                | Severe   | 0               | 0               | 0                  | 1 (3.1)      | 1 (0.9)    |
| Total (Related & Unrelated)                    | Mild     | 14 (61.9)       | 17 (77.3)       | 26 (74.29)         | 17 (53.1)    | 74 (67.27) |
|                                                | Moderate | 7 (33.67)       | 5 (22.7)        | 9 (25.7)           | 13 (40.6)    | 34 (30.9)  |
|                                                | Severe   | 0               | 0               | 0                  | 2 (6.25)     | 2 (1.82)   |

Supplementary Table S5(b): Tabulation of AEs according to predefined categories. % are by column.

| Predefined Category      | Severity        | Placebo<br>n(%) | Aspirin<br>n(%) | Ticagrelor<br>n(%) | DAPT<br>n(%) | Total      |
|--------------------------|-----------------|-----------------|-----------------|--------------------|--------------|------------|
| Exacerbation of COPD     | <b>Total</b>    | 16              | 19              | 24                 | 11           | 70         |
|                          | <b>Mild</b>     | 12 (75)         | 15 (78.95)      | 20 (83.3)          | 9 (81.8)     | 56 (80)    |
|                          | <b>Moderate</b> | 4 (25)          | 4 (21.05)       | 4 (16.7)           | 1 (9.09)     | 13 (18.57) |
|                          | <b>Severe</b>   | 0               | 0               | 0                  | 1 (9.09)     | 1 (1.43)   |
| Worsening Breathlessness | <b>Total</b>    | 1               | 0               | 5                  | 7            | 13         |
|                          | <b>Mild</b>     | 0               | 0               | 1 (20)             | 0            | 1 (7.69)   |
|                          | <b>Moderate</b> | 1 (100)         | 0               | 4 (80)             | 7 (100)      | 12 (92.3)  |
|                          | <b>Severe</b>   | 0               | 0               | 0                  | 0            | 0          |
| Other                    | <b>Total</b>    | 4               | 3               | 6                  | 14           | 27         |
|                          | <b>Mild</b>     | 2 (50)          | 2 (66.67)       | 5 (83.3)           | 8 (57.1)     | 17 (62.96) |
|                          | <b>Moderate</b> | 2 (50)          | 1 (33.3)        | 1 (16.7)           | 5 (35.7)     | 9 (33.3)   |
|                          | <b>Severe</b>   | 0               | 0               | 0                  | 1 (7.14)     | 1 (3.7)    |

**Supplementary Table S5 (c): Clinical events at 6 months.**

| <b>Clinical event</b>                                                         | <b>Placebo</b> | <b>Aspirin</b> | <b>Ticagrelor</b> | <b>DAPT</b> | <b>Total</b> |
|-------------------------------------------------------------------------------|----------------|----------------|-------------------|-------------|--------------|
| <b>Any hospitalisation during study period (for heart problems) Yes</b>       | 3 (10.7%)      | 4 (14.3%)      | 3 (13.0%)         | 4 (17.4%)   | 14 (13.7%)   |
| <b>Exacerbation of COPD Yes</b>                                               | 13 (46.4%)     | 15 (53.6%)     | 13 (56.5%)        | 10 (43.5%)  | 51 (50.0%)   |
| <b>Pneumonia or chest infections Yes</b>                                      | 2 (7.1%)       | 1 (3.6%)       | 0 (0.0%)          | 2 (8.7%)    | 5 (4.9%)     |
| <b>Diagnosis of angina (stable) Yes</b>                                       | 0 (0.0%)       | 0 (0.0%)       | 0 (0.0%)          | 1 (4.3%)    | 1 (1.0%)     |
| <b>Begun taking aspirin/other blood thinners or cholesterol tablets Yes</b>   | 0 (0.0%)       | 0 (0.0%)       | 0 (0.0%)          | 1 (4.3%)    | 1 (1.0%)     |
| <b>Any flare ups of their chest requiring antibiotics/and or steroids Yes</b> | 12 (42.9%)     | 13 (46.4%)     | 14 (60.9%)        | 11 (47.8%)  | 50 (49.0%)   |
| <b>Started any new medication for their heart and lungs Yes</b>               | 1 (3.6%)       | 2 (7.1%)       | 1 (4.3%)          | 2 (8.7%)    | 6 (5.9%)     |



**Supplementary Table S6 (a): Reported SAEs on ITT population.**

| Related to treatment | Severity | Placebo n(%) | Aspirin n(%) | Ticagrelor n(%) | DAPT n(%) | Total     |
|----------------------|----------|--------------|--------------|-----------------|-----------|-----------|
| Unrelated            | Mild     | 0            | 0            | 0               | 0         | 0         |
|                      | Moderate | 1 (9.09)     | 1 (14.29)    | 2 (33.3)        | 3 (42.86) | 7 (22.58) |
|                      | Severe   | 10 (90.9)    | 6 (85.7)     | 4 (66.7)        | 4 (57.1)  | 24 (77.4) |

**Supplementary Table S6 (b): Tabulation of SAEs according to pre-defined categories.**

| Predefined Category       | Severity     | Placebo  | Aspirin  | Ticagrelor | DAPT     | Total     |
|---------------------------|--------------|----------|----------|------------|----------|-----------|
| Exacerbation of COPD n(%) | <b>Total</b> | 6        | 1        | 2          | 1        | 10        |
|                           | Mild         | 0        | 0        | 0          | 0        | 0         |
|                           | Moderate     | 1 (16.7) | 0        | 1 (50)     | 0        | 2 (20)    |
|                           | Severe       | 5 (83.3) | 1 (100)  | 1 (50)     | 1 (100)  | 8 (80)    |
| Pneumonia n(%)            | <b>Total</b> | 1        | 2        | 0          | 1        | 4         |
|                           | Mild         | 0        | 0        | 0          | 0        | 0         |
|                           | Moderate     | 0        | 0        | 0          | 0        | 0         |
|                           | Severe       | 1 (100)  | 2 (100)  | 0          | 1 (100)  | 4 (100)   |
| Death n(%)                | <b>Total</b> | 1        | 0        | 1          | 0        | 2         |
| Other n(%)                | <b>Total</b> | 3        | 3        | 2          | 3        | 11        |
|                           | Mild         | 0        | 0        | 0          | 0        | 0         |
|                           | Moderate     | 0        | 1 (33.3) | 1 (50)     | 1 (33.3) | 3 (27.27) |
|                           | Severe       | 3 (100)  | 2 (66.7) | 1 (50)     | 2 (66.7) | 8 (72.7)  |
| Hospitalisation † n(%)    | <b>Total</b> | 0        | 1        | 1          | 2        | 4         |
|                           | Mild         | 0        | 0        | 0          | 0        | 0         |
|                           | Moderate     | 0        | 0        | 0          | 2 (100)  | 2 (50)    |
|                           | Severe       | 0        | 1 (100)  | 1 (100)    | 0        | 2 (50)    |

† these patients were categorised as hospitalised rather than the reason for an SAE. Please see line listing for more details. NB. From the line listing and paper forms it appears that patients should have been categorised as Other, Exacerbation of COPD, Exacerbation of COPD and Stable Angina for the Aspirin only arm, Ticagrelor only arm and DAPT arm respectively.

## Supplemental Figure S1

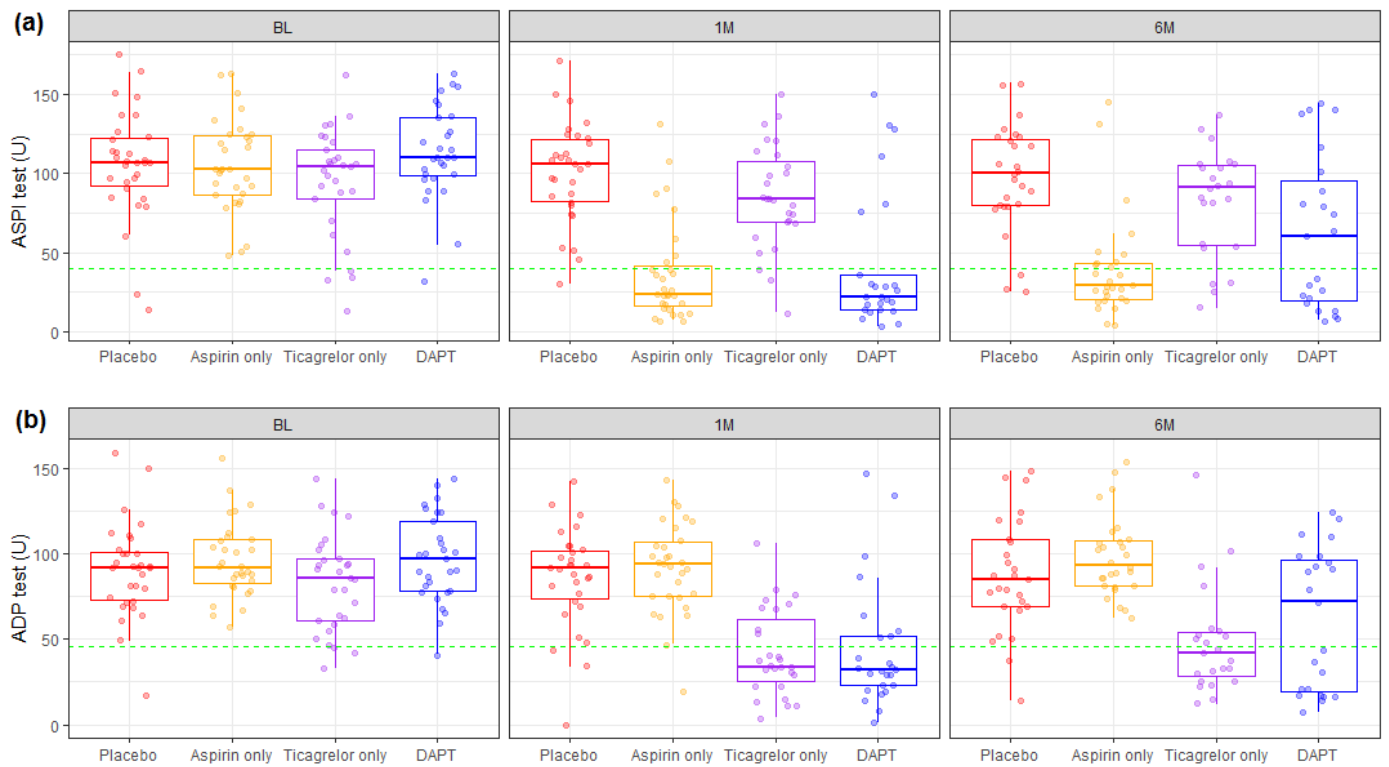

Boxplots of the (a) ASPI test and the (b) ADP test split by treatment groups over time (ITT analysis set).

The green dashed line indicated the threshold below which patients are considered to be responders
